# Supplementary material for: Case-Based Virtual Reality Simulation for Penetrating Facial Wound Suture Skill Training in Medical Students: Design and Pilot Study
Source: Research Square preprint supplement (doi:10.21203/rs.3.rs-6974679/v1), 2025-07-30
Supplement: Supplementary file 1 [file f6215b5941cec44a7c67fcda.docx]

**Table S1 Scoring criteria for “History and Physical Examination”, “Wound Inspection” , “Pre-operation preparation”, “Wound Irrigation”; “Debridement”, “Suturing”, “Post-operative instructions” .**

| **Items of assessment criteria** | | **Score** |
| --- | --- | --- |
| **History and Physical Examination** | Assess the patient's history, including tetanus vaccination status, allergies, and the mechanism of injury | 5 |
| **Wound Inspection** | Evaluate the wound size, shape, and location | 10 |
|  | Finish the emergency medical record | 10 |
| **Pre-operation preparation** | Selecting surgical instruments | 5 |
| **Wound Irrigation** | Selecting surgical instruments | 5 |
|  | Anesthesia | 10 |
|  | Cleanse the wound with a sterile saline solution and hydrogen peroxide to remove debris | 5 |
| **Debridement** | Remove devitalized tissue, necrotic tissue, and any foreign bodies | 5 |
|  | Obtain hemostasis | 5 |
| **Suturing** | Selecting surgical instruments including appropriate sutures | 5 |
|  | Perform the closure of mucosa layer with appropriate sutures | 10 |
|  | Perform the closure of muscle layer with appropriate sutures | 10 |
|  | Perform the closure of skin layer with appropriate sutures | 10 |
| **Post-operative instructions** | Healthy propaganda and precautions | 5 |
| **Total** | | 100 |
